# Supplementary material for: Genomic Selection for Dairy Cattle Behaviour Considering Novel Traits in a Changing Technical Production Environment
Source: MDPI journal article supplement (doi:10.3390/genes14101933), 2023-10-13
Supplement: s1 [file s1]

**Table S1.** Genomic regions from GWAS for the traits milking speed and milking temperament in dairy (crossed) cattle (sorted by chromosome, trait name and chromosome position). The traits were recorded in conventional milking systems, i.e., not in AMS, or information about milking system did not exist.

| BTA | Trait               | Chromosome position | Associated gene/QTL <sup>1</sup>                           | Breed | Reference |
|-----|---------------------|---------------------|------------------------------------------------------------|-------|-----------|
| 1   | Milking speed       | 8,164,917 bp        | <i>ADAMTS5</i>                                             | HF    | [167]     |
|     |                     | 128,420,783 bp      | <i>RASA2</i>                                               | HF    | [166]     |
|     |                     | 134,451,951 bp      | <i>LSS</i>                                                 | HF    | [167]     |
|     | Milking temperament | 142,988,689 bp      | <i>PDE9A</i>                                               | HF    | [136]     |
|     |                     | 60,491,479 bp       | <i>GAP43, LSAMP</i>                                        | HF    | [168]     |
|     |                     | 61,279,697 bp       | -                                                          | HF    | [168]     |
| 2   | Milking speed       | 85,362,275 bp       | <i>HECW2</i>                                               | HF    | [137]     |
|     | Milking temperament | 41,433,774 bp       | <i>KCNJ3</i>                                               | HF    | [168]     |
| 3   | Milking speed       | 26,331,630 bp       | <i>CD101</i>                                               | HF    | [166]     |
|     |                     | 67,303,946 bp       | <i>ZZZ3</i>                                                | HF    | [166]     |
|     |                     | 77,446,808 bp       | <i>WLS</i>                                                 | HF    | [166]     |
|     |                     | 120,122,176 bp      | <i>OTOS</i>                                                | HF    | [137]     |
|     | Milking temperament | 12,962,750 bp       | <i>FCRL5, LOC100849046, LOC784007</i>                      | HF    | [168]     |
|     |                     | 26,543,998 bp       | <i>CD2, IGSF3</i>                                          | HF    | [168]     |
|     |                     | 61,388,404 bp       | -                                                          | HF    | [168]     |
|     |                     | 67,716,160 bp       | <i>PIGK</i>                                                | HF    | [166]     |
| 4   | Milking speed       | 18,630,065 bp       | -                                                          | HF    | [168]     |
|     |                     | 56,610,485 bp       | -                                                          | HF    | [168]     |
|     |                     | 70,201,858 bp       | -                                                          | HF    | [136]     |
|     | Milking temperament | 40,499,442 bp       | <i>NRCAM</i>                                               | HF    | [167]     |
|     |                     |                     |                                                            |       |           |
| 5   | Milking speed       | 28,975,642 bp       | <i>LOC5122464, LOC112441543, HIGD1C, METTL74, TMPRSS12</i> | HF    | [168]     |
|     |                     | 37,711,059 bp       | -                                                          | HF    | [136]     |
|     |                     | 75,361,846 bp       | <i>CACNG2</i>                                              | HF    | [166]     |
|     | Milking temperament | 76,755,076 bp       | <i>SYT10</i>                                               | HF    | [166]     |
|     |                     | 105,350,319 bp      | <i>KCNA6</i>                                               | HF    | [136]     |
|     |                     | 105,474,132         | <i>NDUFA9</i>                                              | HF    | [136]     |
|     |                     | 106,223,457 bp      | <i>TIGAR</i>                                               | HF    | [137]     |
|     |                     | 64,565,816 bp       | <i>SCYL2</i>                                               | HF    | [166]     |
|     |                     | 65,301,359 bp       | <i>ANO4</i>                                                | HF    | [166]     |
|     |                     | 68,461,765 bp       | <i>CHST11</i>                                              | HF    | [166]     |
|     |                     | 68,586,846 bp       | <i>CHST11</i>                                              | HF    | [166]     |
|     |                     |                     |                                                            |       |           |
|     |                     |                     |                                                            |       |           |
|     |                     |                     |                                                            |       |           |

|   |                     |                |                                                  |             |       |
|---|---------------------|----------------|--------------------------------------------------|-------------|-------|
|   |                     | 70,338,965 bp  | <i>RFX4</i>                                      | HF          | [166] |
|   |                     | 71,778,071 bp  | <i>SYN3, TIMP3</i>                               | HF          | [166] |
|   |                     | 71,810,896 bp  | <i>SYN3</i>                                      | HF          | [166] |
|   |                     | 82,513,431 bp  | <i>MRPS35</i>                                    | HF          | [166] |
|   |                     | 88,105,584 bp  | <i>LOC520387</i>                                 | HF          | [166] |
|   |                     | 95,149,822 bp  | <i>RERG</i>                                      | HF          | [166] |
|   |                     | 109,364,642 bp | <i>CACNA1C, IL17RA, CECR5, CECR1</i>             | HF          | [135] |
|   |                     | 136 M          | -                                                | HF          | [7]   |
| 6 | Milking speed       | 1,623,443 bp   | -                                                | HF          | [168] |
|   |                     | 102,771,937 bp | <i>PPP2R2C</i>                                   | HF          | [136] |
|   |                     | 103,186,091 bp | <i>ENSBTAG00000053771</i>                        | HF          | [136] |
|   |                     | 104,310,525 bp | -                                                | HF          | [136] |
|   |                     | 104,350,026 bp | -                                                | HF          | [136] |
|   |                     | 104,379,509 bp | -                                                | HF          | [136] |
|   |                     | 110,478,351 bp | <i>LOC100298588</i>                              | HF          | [166] |
|   |                     | 110,828,142 bp | <i>CC2D2A, FBXL5 LOC100849050, BST1</i>          | HF          | [168] |
|   |                     | 118,922,500 bp | <i>KIAA1329</i>                                  | HF          | [166] |
|   | Milking temperament | 32,808,304 bp  | -                                                | HF          | [168] |
|   |                     | 38,881,648 bp  | -                                                | HF          | [168] |
|   |                     | 99,732,094 bp  | <i>PLAC8</i>                                     | HF          | [166] |
| 7 | Milking speed       | 45,196,738 bp  | <i>POLR2E</i>                                    | HF          | [137] |
| 8 | Milking speed       | 59,424,073 bp  | <i>VCP, FANCG, PIGO, STOML2, FAM214B, UNC13B</i> | HF          | [168] |
|   |                     | 70,535,700 bp  | <i>PEBP4</i>                                     | HF          | [166] |
|   |                     | 74,722,735 bp  | <i>EPHX2, GULO HTD2, LOC781261, APTX</i>         | HF          | [168] |
|   |                     | 74,730,092 bp  | <i>DNAJA1, SMU1</i>                              | HF          | [168] |
|   |                     | 85,645,138 bp  | <i>IPPK</i>                                      | HF          | [137] |
|   | Milking temperament | 89,513,243 bp  | <i>NXNL2</i>                                     | HF          | [168] |
|   |                     | 91,408,357 bp  | <i>GRIN3A, PPP3R2</i>                            | HF          | [168] |
| 9 | Milking speed       | 2,526,481 bp   | -                                                | HF          | [168] |
|   |                     | 16,815,501 bp  | -                                                | Brown Swiss | [135] |
|   |                     | 73,175,040 bp  | -                                                | HF          | [136] |
|   |                     | 83,283,165 bp  | <i>UTRN</i>                                      | HF          | [166] |
|   |                     | 88,469,911 bp  | <i>PPP1R14C</i>                                  | HF          | [137] |
|   | Milking temperament | 4,614,571 bp   | -                                                | HF          | [168] |

|    |                     |                |                                                                                    |             |       |
|----|---------------------|----------------|------------------------------------------------------------------------------------|-------------|-------|
|    |                     | 29,540,351 bp  | -                                                                                  | HF          | [168] |
|    |                     | 29,866,887 bp  | <i>TBC1D32</i>                                                                     | HF          | [168] |
|    |                     | 29,898,522 bp  | -                                                                                  | HF          | [168] |
|    |                     | 62,471,145 bp  | <i>RARS2, SLC35A1, CFAP206, C9Horf163</i>                                          | HF          | [168] |
|    |                     | 101,306,064 bp | <i>PRR18, SFT2D1, MPC1, RPS6KA2</i>                                                | HF          | [168] |
| 10 | Milking speed       | 19,944,056 bp  | <i>TGM1</i>                                                                        | HF          | [167] |
|    |                     | 28,155,181 bp  | <i>LOC788797, LOC788790, LOC788778, LOC504344, LOC788740, LOC521749, LOC516467</i> | HF          | [168] |
|    |                     | 29,028,329 bp  | <i>RYR3</i>                                                                        | HF          | [166] |
|    |                     | 53,949,424 bp  | <i>MNS1</i>                                                                        | HF          | [137] |
|    | Milking temperament | 14,638,815 bp  | <i>MAP2K5, SKOR1</i>                                                               | HF          | [168] |
|    |                     | 20,196,716 bp  | <i>NEO1, HCN4, REC114</i>                                                          | HF          | [168] |
| 11 | Milking speed       | 33,416,170 bp  | <i>NRXN1</i>                                                                       | HF          | [168] |
|    |                     | 55,348,499 bp  | <i>CTNNA2</i>                                                                      | HF          | [168] |
|    |                     | 76,490,540 bp  | -                                                                                  | HF          | [168] |
|    |                     | 77,563,811 bp  | -                                                                                  | HF          | [168] |
|    |                     | 81,666,608 bp  | <i>FAM49A</i>                                                                      | HF          | [137] |
|    |                     | 83,456,178 bp  | -                                                                                  | HF          | [168] |
|    |                     | 86,130,607 bp  | <i>LPIN1, NTSR2</i>                                                                | Brown Swiss | [135] |
|    | Milking temperament | 59,587,479     | <i>LRRTM4</i>                                                                      | HF          | [168] |
| 12 | Milking speed       | 10,668,524 bp  | <i>OLFM4</i>                                                                       | Brown Swiss | [135] |
|    |                     | 32,324,036 bp  | <i>SGSG</i>                                                                        | HF          | [137] |
|    | Milking temperament | 80,284,325 bp  | -                                                                                  | HF          | [168] |
|    |                     | 80,304,993 bp  | -                                                                                  | HF          | [168] |
| 13 | Milking speed       | 2,738,460 bp   | <i>PAK5</i>                                                                        | HF          | [168] |
|    | Milking temperament | 32,497,741 bp  | <i>TMEM236</i>                                                                     | HF          | [166] |
|    |                     | 60,045,226 bp  | <i>MGC142355</i>                                                                   | HF          | [167] |
| 14 | Milking speed       | 8,264,685 bp   | <i>ZFAT</i>                                                                        | HF          | [137] |
|    |                     | 29,408,225 bp  | <i>CYP7B1</i>                                                                      | HF          | [168] |
|    |                     | 33,747,936 bp  | <i>PRDM14, NCOA2</i>                                                               | HF          | [168] |
|    |                     | 33,891,204 bp  | -                                                                                  | HF          | [168] |
|    |                     | 33,892,181 bp  | -                                                                                  | HF          | [168] |
|    |                     | 65,573,091 bp  | <i>YWHAZ</i>                                                                       | Brown Swiss | [135] |
|    | Milking temperament | 49,856,629 bp  | -                                                                                  | HF          | [168] |

|    |                     |               |                                                                                                                                       |             |       |
|----|---------------------|---------------|---------------------------------------------------------------------------------------------------------------------------------------|-------------|-------|
|    |                     | 55,580,399 bp | -                                                                                                                                     | Brown Swiss | [135] |
| 16 | Milking speed       | 2,876,485 bp  | <i>TMCC2</i>                                                                                                                          | HF          | [137] |
|    |                     | 64,722,850 bp | <i>NCF2, ARPC5, RGL1, APOBEC4</i>                                                                                                     | HF          | [168] |
|    | Milking temperament | 18,812,423 bp | <i>KCTD3, USH2A</i>                                                                                                                   | HF          | [168] |
|    |                     | 18,815,839 bp | -                                                                                                                                     | HF          | [168] |
| 17 | Milking speed       | 47,753,340 bp | <i>PIWIL1</i>                                                                                                                         | HF          | [166] |
|    |                     | 74,598,498 bp | <i>DGCR2</i>                                                                                                                          | HF          | [137] |
|    | Milking temperament | 56,150,431 bp | <i>HSPB8, SRRM4</i>                                                                                                                   | HF          | [168] |
| 18 | Milking speed       | 32,867,187 bp | <i>CDH11</i>                                                                                                                          | HF          | [168] |
|    |                     | 57,534,701 bp | <i>CEACAM18</i>                                                                                                                       | HF          | [137] |
|    | Milking temperament | 58,270,112 bp | <i>BOSTAUV1R417, BOSTAUV1R418, BOSTAUV1R419</i><br><i>LOC112442216, LOC112442217, LOC101910094, LOC787057,</i><br><i>LOC112442214</i> | HF          | [168] |
|    |                     | 105 cM        | -                                                                                                                                     | HF          | [7]   |
| 19 | Milking speed       | 7,250,802 bp  | <i>ANKFN1</i>                                                                                                                         | HF          | [136] |
|    |                     | 7,300,658 bp  | <i>ENSBTAG00000038823</i>                                                                                                             | HF          | [136] |
|    |                     | 7,333,959 bp  | -                                                                                                                                     | HF          | [136] |
|    |                     | 7,717,717 bp  | <i>TRIM25</i>                                                                                                                         | HF          | [136] |
|    |                     | 9,944,425 bp  | <i>TRIM37</i>                                                                                                                         | HF          | [136] |
|    |                     | 10,691,042 bp | <i>VMP1</i>                                                                                                                           | HF          | [136] |
|    |                     | 19,814,327 bp | <i>TMEM97, IFT20</i>                                                                                                                  | HF          | [136] |
|    |                     | 32,348,116 bp | <i>HS3ST3A1</i>                                                                                                                       | HF          | [166] |
|    |                     | 41,647,314 bp | <i>GAS</i>                                                                                                                            | HF          | [167] |
|    |                     | 51,581,082 bp | <i>MAFG</i>                                                                                                                           | HF          | [137] |
|    |                     | 59,364,966 bp | -                                                                                                                                     | HF          | [136] |
|    |                     | 59,437,500 bp | -                                                                                                                                     | HF          | [136] |
|    |                     | 59,547,890 bp | <i>U6</i>                                                                                                                             | HF          | [136] |
|    |                     | 60,394,610 bp | -                                                                                                                                     | HF          | [168] |
|    | Milking temperament | 15,137,581 bp | <i>SLFN11</i>                                                                                                                         | HF          | [166] |
|    |                     | 37,837,691 bp | <i>CACNA1G</i>                                                                                                                        | HF          | [167] |
| 20 | Milking speed       | 836,751 bp    | <i>SLIT3</i>                                                                                                                          | HF          | [168] |
|    |                     | 6,586,964 bp  | -                                                                                                                                     | HF          | [136] |
|    |                     | 47,410,881 bp | -                                                                                                                                     | HF          | [137] |
|    |                     | 62,244,291 bp | <i>CTNND2</i>                                                                                                                         | HF          | [168] |

|    |                     |               |                                                    |    |       |
|----|---------------------|---------------|----------------------------------------------------|----|-------|
|    |                     | 67,686,024 bp | <i>ICE1</i>                                        | HF | [168] |
| 21 | Milking speed       | 2,690,162 bp  | <i>ATP10A</i>                                      | HF | [137] |
|    | Milking temperament | 30,325,061 bp | <i>OTUD7A, ADAMTS7, TBC1D2B</i>                    | HF | [168] |
| 22 | Milking speed       | 6,287,984 bp  | <i>OSBPL10</i>                                     | HF | [168] |
|    |                     | 59,712,580 bp | <i>GP9</i>                                         | HF | [137] |
|    | Milking temperament | 46,425,659 bp | <i>CACNA1D</i>                                     | HF | [167] |
|    |                     | 59,471,127 bp | <i>EEFSEC, RUVBL1, SEC61A1</i>                     | HF | [168] |
|    |                     | 59,619,868 bp | <i>KBTBD12, MGLL</i>                               | HF | [168] |
| 23 | Milking speed       | 28,460,633 bp | <i>PPP1R10, ATAT1, MRPS18B, ABCF1 PRR3</i>         | HF | [168] |
|    |                     | 28,463,360 bp | <i>GNL1, RPP21, LOC615278, LOC512672, BOLA-NC1</i> | HF | [168] |
|    | Milking temperament | 2,338,177 bp  | -                                                  | HF | [168] |
|    |                     | 13,897,540 bp | <i>BYSL</i>                                        | HF | [167] |
| 24 | Milking speed       | 10,100,503 bp | <i>CDH19</i>                                       | HF | [168] |
|    |                     | 14,505,480 bp | -                                                  | HF | [168] |
|    |                     | 20,051,012 bp | <i>HMCS</i>                                        | HF | [167] |
|    | Milking temperament | 19,206,273 bp | -                                                  | HF | [168] |
| 25 | Milking speed       | 34,596,606 bp | <i>CCL24</i>                                       | HF | [137] |
|    |                     | 39,791,709 bp | <i>SDK1</i>                                        | HF | [168] |
| 26 | Milking speed       | 34,495,734 bp | <i>SLC18A2</i>                                     | HF | [167] |
|    |                     | 44,539,739 bp | <i>LHPP</i>                                        | HF | [137] |
|    |                     | 46,250,006 bp | <i>C26H10orf90</i>                                 | HF | [168] |
|    | Milking temperament | 34,495,734 bp | <i>SLC18A2</i>                                     | HF | [167] |
| 27 | Milking speed       | 14,713,849 bp | <i>STOX2, ENPP6</i>                                | HF | [168] |
|    |                     | 32,834,272 bp | <i>FGFR1</i>                                       | HF | [167] |
|    |                     | 40,306,840 bp | <i>RARB</i>                                        | HF | [168] |
|    | Milking temperament | 35,413,178 bp | -                                                  | HF | [168] |
|    |                     | 35,420,916 bp | -                                                  | HF | [168] |
|    |                     | 35,737,738 bp | <i>ZMAT4</i>                                       | HF | [168] |
|    |                     | 35,737,851 bp | -                                                  | HF | [168] |
|    |                     | 35,739,454 bp | -                                                  | HF | [168] |
|    |                     | 39,668,668 bp | -                                                  | HF | [168] |
|    |                     | 44,198,674 bp | <i>ZNF385D</i>                                     | HF | [168] |
| 28 | Milking speed       | 24,678,582 bp | <i>HERC4</i>                                       | HF | [137] |
|    |                     | 28,953,159 bp | <i>MCU</i>                                         | HF | [166] |

|    |                     |                |                           |    |       |
|----|---------------------|----------------|---------------------------|----|-------|
| 29 | Milking speed       | 45,629,483 bp  | <i>CHKA</i>               | HF | [136] |
|    |                     | 49,779,067 bp  | <i>TRPM5</i>              | HF | [137] |
|    | Milking temperament | 8.3 – 15. Mbp  | BMS764-BMC8012            | HF | [7]   |
|    |                     | 23,068,761 bp  | <i>LOC782544</i>          | HF | [167] |
|    |                     | 23,753,023 bp  | <i>NELL1</i>              | HF | [168] |
|    |                     | 30,954,390 bp  | <i>HNT</i>                | HF | [167] |
|    |                     | 36,737,805 bp  | <i>LOC510943</i>          | HF | [167] |
|    |                     | 38,944,167 bp  | <i>DPP3</i>               | HF | [167] |
|    |                     | 45,482,143 bp  | <i>C11orf80</i>           | HF | [166] |
| X  | Milking speed       | 86,996,906 bp  | -                         | HF | [136] |
|    | Milking temperament | 813,448 bp     | -                         | HF | [136] |
|    |                     | 863,652 bp     | -                         | HF | [136] |
|    |                     | 9 cM           | -                         | HF | [136] |
|    |                     | 62,929,712 bp  | -                         | HF | [136] |
|    |                     | 74,200,611 bp  | <i>ENSBTAG00000026025</i> | HF | [136] |
|    |                     | 74,239,322 bp  | <i>TAF9B</i>              | HF | [136] |
|    |                     | 74,434,775 bp  | <i>ATP7A</i>              | HF | [136] |
|    |                     | 131,311,943 bp | -                         | HF | [136] |

<sup>1</sup>Genes are written in italic, QTLs are written in non-italic; Annotation tools and databases for gene annotation and QTL detection differ in different studies
